# Supplementary material for: Circulating SOD2 Is a Candidate Response Biomarker for Neoadjuvant Therapy in Breast Cancer
Source: MDPI journal article supplement (doi:10.3390/cancers14163858), 2022-08-10

## Supplementary Materials

**Table S1.** Patients' clinical data.

**Figure S1.** Plot showing spectral count measurements comparing results from a secretome processed using the standard proteomic workflow with a protocol using a pretreatment with Proteinase K.

**Figure S2.** Cell proliferation of BT549 cells resistant to paclitaxel.

**Figure S3.** SOD2-I58T mutant is not recognized by ELISA. SOD2 levels were measured in two secretomes, from BT549-WT and BT549-shSOD2-I58T cells, by immunoblot (left panel) and by ELISA (right panel).

**Figure S4.** Uncropped blots

# Table S1

| ID    | Breast Cancer Subtype   | Histologic grade | Ki67 (%) | cTNM   | Neoadjuvant chemotherapy               | Clinical response | Radiologic response <sup>a</sup> | Data IQ    | ypTNM       | Relapse |
|-------|-------------------------|------------------|----------|--------|----------------------------------------|-------------------|----------------------------------|------------|-------------|---------|
| Neo_1 | Luminal B HER2 -        | 2                | 30       | T3N3M0 | Paclitaxel > Antracyclines             | CR                | PR                               | 4/11/2016  | ypT1aN1mic  | Yes     |
| Neo_2 | Luminal B HER2 - --> TN | 2                | 45       | T2N0M0 | Paclitaxel > Antracyclines             | PR                | SD                               | 4/21/2016  | ypT2N0      | No      |
| Neo_3 | Luminal B HER2 -        | 3                | 70       | T2N0M0 | Paclitaxel > Antracyclines             | CR                | CR                               | 7/31/2018  | ypT1bN0     | No      |
| Neo_4 | TNBC                    | 2                | 70       | T2N1M0 | Carboplatin-Paclitaxel > Antracyclines | CR                | CR                               | 9/7/2018   | ypT0N0- pCR | No      |
| Neo_5 | TNBC                    | 3                | 80       | T2N0M0 | Carboplatin-Nab-Paclitaxel (only 8C)   | CR                | CR                               | 10/10/2018 | ypT0N0- pCR | No      |
| Neo_6 | TNBC                    | 3                | 95       | T2N3M0 | Carboplatin-Paclitaxel -> Myocet-Ciclo | CR                | PR                               | 8/28/2018  | ypT0N0- pCR | Yes     |
| Neo_7 | Luminal A               | 2                | 15       | T3N0M0 | Antracyclines > Paclitaxel             | CR                | PR                               | 11/23/2018 | ypT1bN1 mic | No      |
| Neo_8 | TNBC                    | 3                | 55       | T2N0M0 | Carboplatin-Paclitaxel > Antracyclines | CR                | CR                               | 11/7/2018  | ypTisN0     | No      |

Notes:

a: Radiologic response assessment to neoadjuvant chemotherapy was done to classify disease outcome as a complete response (CR), partial response (PR), stable disease (SD) or progressive disease (PD) using the RECIST criteria v1.1.

**Figure S1**

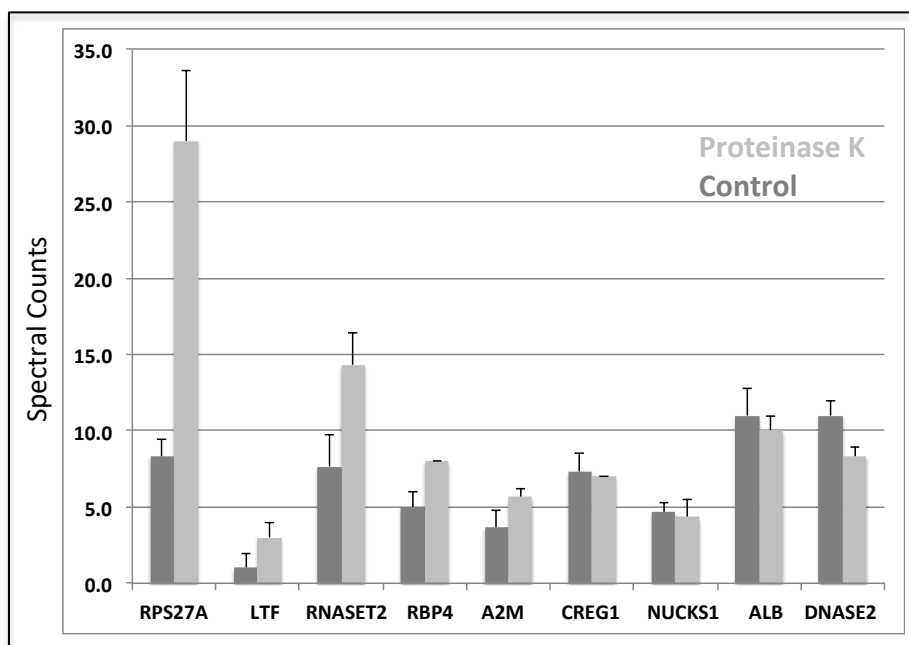

## BT549 cells resistant to Paclitaxel

time 0h

time 72h

Control

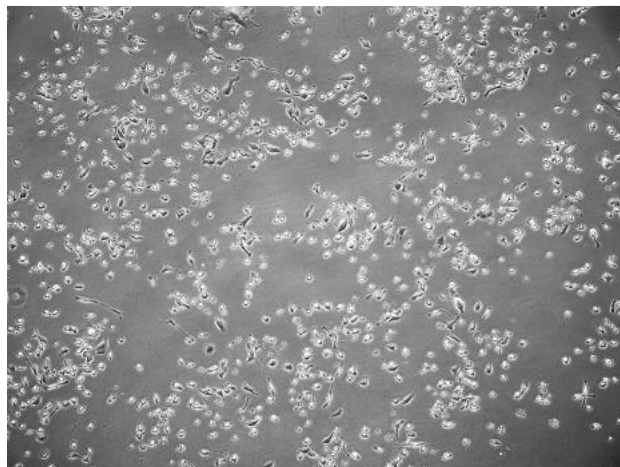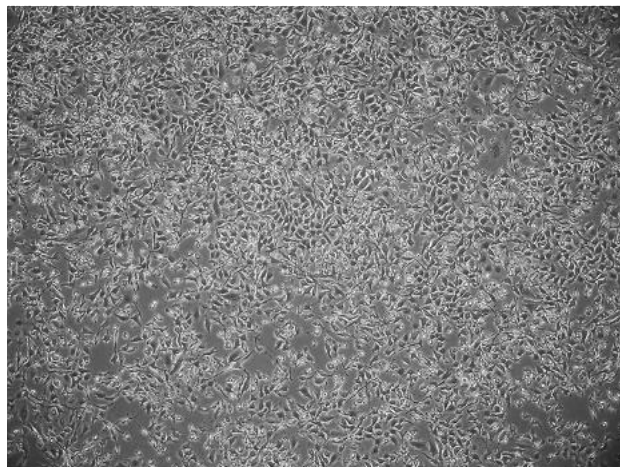

Paclitaxel 4 nM

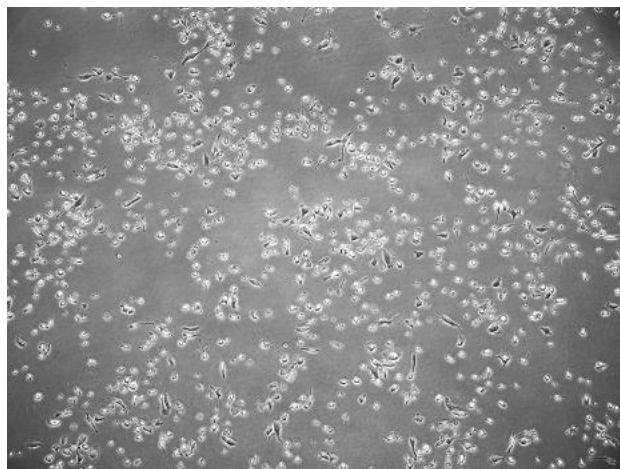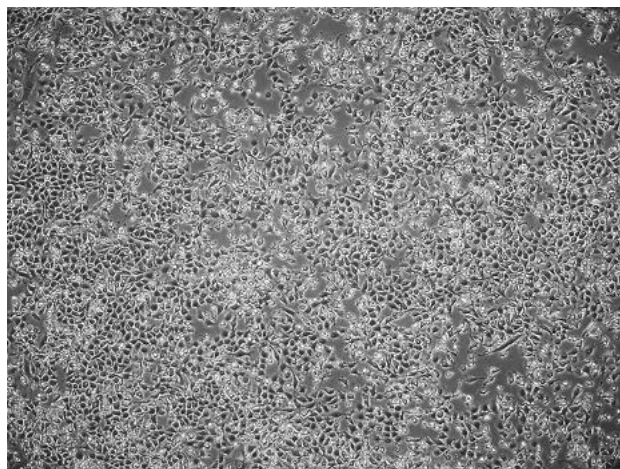

# BT549 Secretomes

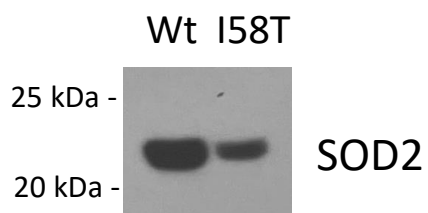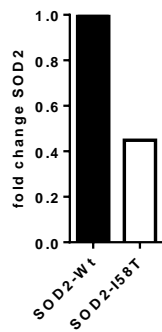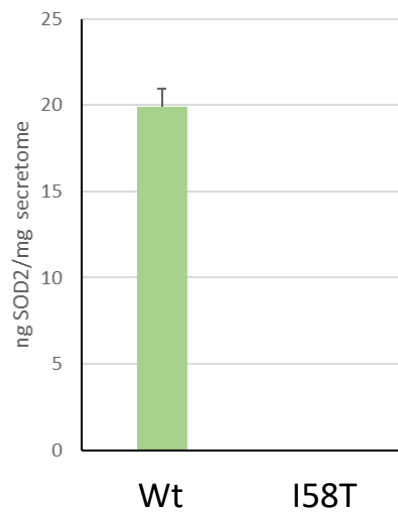

## Uncropped blots

Figure 2A

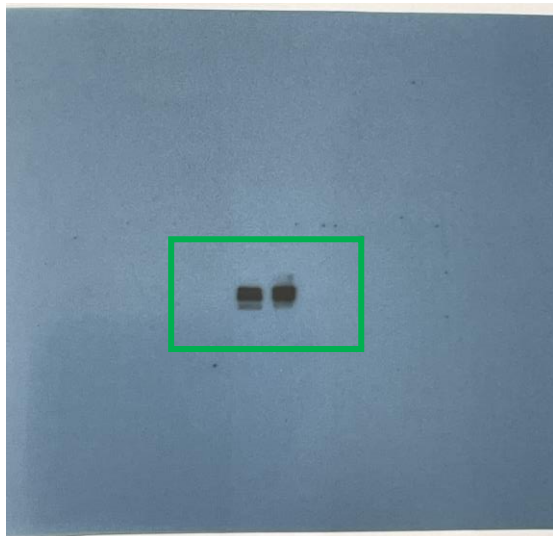

Figure 2A and 2C

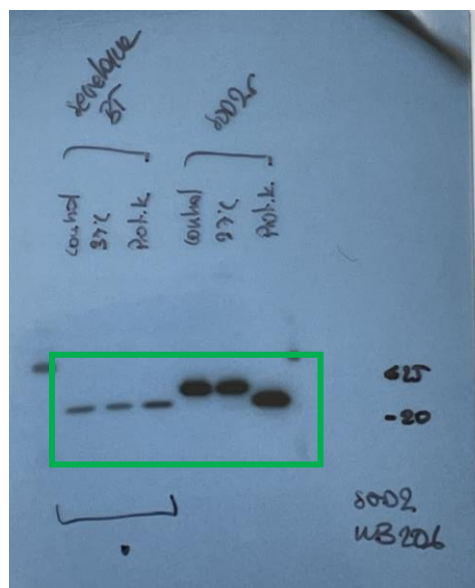

Figure 2C

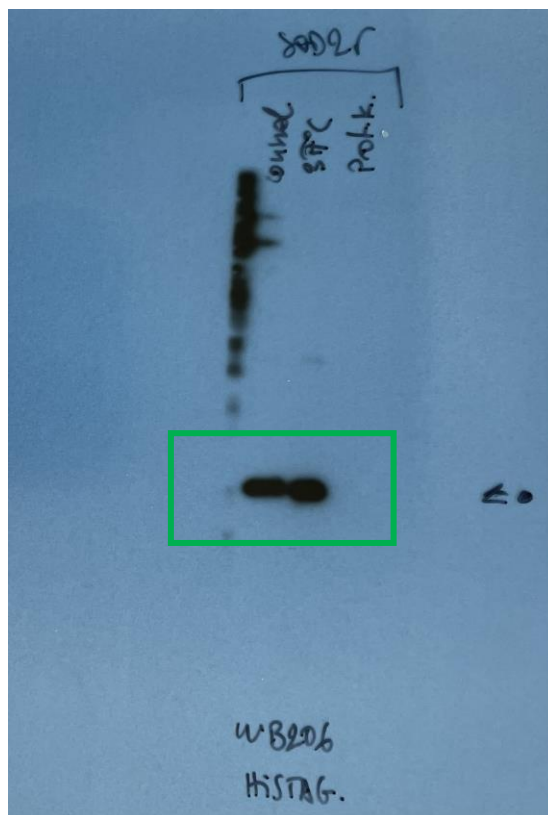

WB normal.      WB DTT mobil.

| WT |   | T82 |   | WT |   | T82 |   |
|----|---|-----|---|----|---|-----|---|
| -  | + | -   | + | -  | + | -   | + |

Hisatani

WB200  
αB200 & RB.

$\alpha \beta \gamma \delta \epsilon \zeta \eta \theta.$

Figure S3

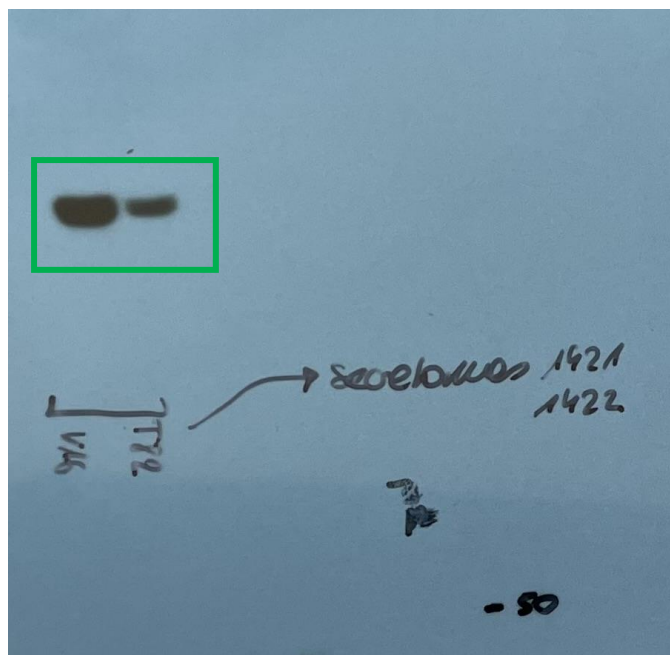

Figure 4B

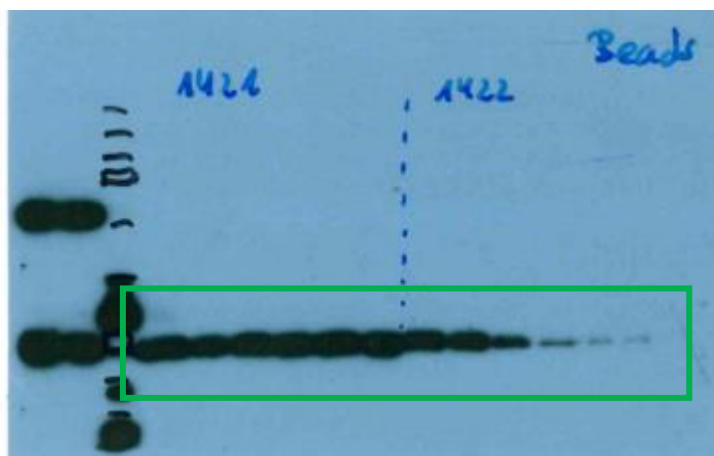

Supplement: s1 [file s1]
